# Supplementary material for: Arabidopsis Circadian Clock Repress Phytochrome a Signaling
Source: Front Plant Sci. 2022 May 11;13:809563. doi: 10.3389/fpls.2022.809563 (PMC9131076; doi:10.3389/fpls.2022.809563)
Supplement: Supplementary file 1 [file Data_Sheet_1.xlsx]

## Sheet: Sheet2
time locus	AT1G03680	AT1G06460	AT1G08550	AT1G13930	AT1G15820	AT1G15980	AT1G18330	AT1G18710	AT1G18730	AT1G19670	AT1G20020	AT1G50250	AT1G51400	AT1G53670	AT1G54040	AT1G54050	AT1G54780	AT1G55370	AT1G56650	AT1G66980	AT1G67740	AT2G15970	AT2G29090	AT2G29450	AT2G46340	AT2G46340	AT2G46820	AT3G05800	AT3G08940	AT3G16140	AT3G27925	AT3G47470	AT3G50820	AT3G61220	AT3G61470	AT4G02260	AT4G03400	AT4G10340	AT4G12800	AT4G15440	AT4G16950	AT4G19500	AT4G22890	AT4G25480	AT4G37930	AT5G26930	AT5G36910	AT5G40170	AT5G42270
ZT0	1195.04	303.515	87.7663	721.499	5835.32	586.337	59.3436	28.7226	647.907	167.931	1026.49	879.03	6607.68	691.228	51.11	24.8131	2880.82	33.6152	5.57748	12.0202	4357.01	740.969	6.86162	338.308	370.788	35.2393	2559.41	22.9807	5985.79	3061.96	436.35	5059.47	2785.89	319.726	9608.75	72.9547	8.66979	7561.71	4884.23	9.80572	62.8055	4.54557	1948.44	6.02904	3187.62	3.19385	240.173	132.376	1128.59
ZT4	1648.44	474.279	151.657	4609.64	6573.57	931.184	244.047	141.803	769.19	147.794	882.231	1161.69	6289.31	887.247	139.198	53.8419	4835.62	51.8175	11.0853	20.7619	4994.89	2663.21	33.0345	626.341	536.252	64.3349	3969.33	37.809	6825.55	3726.1	500.083	8510.04	3004.41	454.859	8971.66	167.234	50.6643	8430.04	6140.46	11.1738	309.033	5.85116	2551.88	19.0306	4633.62	4.89533	894.062	118.446	2271.75
ZT8	2187.49	2319.17	604.254	8830.88	6442.82	1159.09	284.257	141.458	1085.82	252.965	2386.4	1253.25	6931.24	982.678	246.915	66.3467	5439.15	59.0138	43.0279	65.6191	5371.54	3807.87	57.8825	648.113	549.183	86.2542	4168.75	204.249	7342.2	3938.24	734.146	9094.89	3240.34	553.128	10591.4	219.562	117.412	8851.29	6824.1	8.36505	472.321	8.17718	3134.7	278.328	5296.16	5.01714	908.489	333.359	2156.02
ZT12	2138.63	1761.19	488.972	7128.71	4842.58	828.788	18.0904	108.909	804.48	241.853	3318.76	683.38	3900.82	599.11	193.06	52.0337	3750.29	45.5172	7.29504	38.6338	3993.88	2564.95	13.9069	534.566	275.972	35.9997	3236.91	116.966	2531.29	2995.56	470.508	5179.47	2760.86	383.333	11110.8	174.544	19.6094	8801.94	6403.54	46.1946	280.447	4.50316	2129.01	11.8894	4277.64	3.26832	245.432	215.576	1620.62
ZT16	2107.6	533.118	446.401	1630.63	1401.62	787.979	7.62281	32.412	948.117	116.054	2356.94	859.572	3899.2	525.049	160.288	22.9696	2745.66	47.421	3.86061	25.1784	2971.18	778.803	6.09875	301.671	159.439	19.602	3042.1	47.9893	915.708	2713.78	307.452	1661.06	2529.28	141.182	8534.37	183.092	9.15137	6485.66	4103.94	16.3174	241.668	4.33822	2035.2	4.24906	4589.31	3.13623	53.5957	184.947	1610.15
ZT20	1482.03	430.436	249.132	1491.17	2104.06	604.718	9.79728	44.4836	704.695	88.2781	1364.44	843.716	4708.42	514.397	85.6202	26.6683	2430.2	41.1515	4.78126	18.9194	2848.73	928.983	6.44426	319.853	284.782	22.6595	2347.61	60.0826	2321.13	2675.51	296.102	1993.49	2120.51	235.233	7692.32	133.376	11.5696	5818.09	2540.18	11.2481	174.925	4.2124	1868.18	5.23179	3657.96	3.60988	12.725	162.955	1171.59
ZT24	1153.53	274.318	94.2182	675.87	6250.04	550.85	54.5303	30.9885	651.47	178.756	1084.94	838.282	7098.03	659.719	51.935	26.3075	2760.59	31.931	5.64094	12.1246	4201.67	743.173	6.65587	365.336	376.73	31.823	2597.37	23.8881	5566.68	3028.71	466.457	5541.64	2647.86	338.799	8829.9	75.9381	8.50779	8214.36	5065.2	9.5841	56.8697	4.2409	2013.27	6.45934	2960.82	3.02878	225.476	130.828	1078.59
ZT28	1639.35	513.115	148.951	4322.29	6402.85	886.417	251.722	139.762	787.89	151.472	956.158	1265.33	6866.83	935.541	126.171	55.0907	5130.23	53.7547	11.6185	20.4896	4509.7	2538.2	35.1018	617.332	490.917	58.0193	3587.59	40.2854	6430.86	3881.44	457.873	8783.15	3048.39	467.669	9425.5	181.276	54.344	9179.78	6276.49	11.7751	315.502	5.42011	2417.75	20.0965	5034.13	4.5697	845.441	121.8	2312.93
ZT32	2329.42	2502.64	663.93	8393.65	5916.1	1071.81	301.277	149.489	989.579	246.183	2148.26	1318.55	6748.35	1000.76	248.856	66.0704	4949.14	59.8386	46.4401	62.9398	5870.6	3656.23	61.2674	602.322	511.341	82.9412	4163.47	206.059	7214.54	4027.48	795.72	8529.08	3483.4	599.287	11052.9	213.486	116.712	9121.88	6543.42	8.6488	449.447	7.59721	3388.32	280.947	5426.67	4.97948	934.94	302.553	2214.51
ZT36	1925.18	1879.93	493.47	6772.5	4623.93	756.358	18.2613	98.0375	878.34	241.101	3366.76	644.992	4154.72	656.09	177.812	54.171	4034.09	49.7998	7.17842	36.634	3768.53	2311.98	13.3021	526.129	272.702	35.2979	2975.2	122.68	2734.21	2708.09	425.444	5128.6	2719.85	404.297	10521.1	159.584	21.1477	8697.89	6591.66	50.1401	264.739	4.33261	1987.75	11.426	4102.79	3.33966	220.93	219.402	1639.39
ZT40	2286.97	536.242	454.612	1522	1448.49	792.116	7.60676	31.6466	1010.7	106.773	2388.55	846.314	4070.24	516.008	164.737	24.9391	2788.46	46.5549	4.19679	24.2274	2788.37	829.269	6.10047	304.4	172.743	20.4299	2844.9	43.524	855.858	2943.01	281.619	1621.91	2603.86	150.627	7992.04	169.296	9.13627	6172.3	3733.18	15.6031	218.18	4.16558	2190.43	4.56813	4603.09	3.2939	55.2346	199.84	1750.42
ZT44	1576.9	396.499	250.692	1559.49	1918.97	645.025	9.60205	47.1968	773.875	91.4773	1344.9	886.573	4735.01	494.155	85.3361	26.9003	2189.49	38.8323	4.38167	19.1546	3048.54	922.856	6.53707	324.393	305.802	20.843	2165.16	62.4001	2179.05	2608.97	325.437	2038.53	2100.37	248.319	7048.69	124.162	11.5311	5968.05	2585.2	11.2623	171.302	4.12113	1748.85	5.21117	3802.48	3.38563	13.3282	147.879	1141.36
[truncated: 175 more columns]
